# Supplementary material for: Drivers of population divergence and genetic variation in Elymus breviaristatus (Keng) Keng f. (Poaceae: Triticeae), an endemic perennial herb of the Qinghai-Tibet plateau
Source: Frontiers journal article supplement (doi:10.3389/fevo.2022.1068739), 2022-12-05
Supplement: Table_2.DOCX [file Table_2.DOCX]

**Table S2** The information of 15 pairs of EST-SSR primers

| Primers | Primer sequence | Fragment size (bp) | Nr ID | Nr Description | Nt ID | Nt Description |
| --- | --- | --- | --- | --- | --- | --- |
| MDEB002 | AGTCCTTAGCCCCTAGGACG | 204–246 | EMT02548.1 | Putative disease resistance protein [Aegilops tauschii] | -- | -- |
| AAAGAGAGGAGGGCTGGGAT |
| MDEB024 | ATGTATGGGGCGGGCATATG | 203–224 | -- | -- | BT009244.1 | Triticum aestivum clone wlk1.pk0017.e10:fis, full insert mRNA sequence |
| CAAACCGACGAGAGGTGTCA |
| MDEB025 | GATCCGACGACCTCAGCTTC | 197–228 | BAJ86405.1 | predicted protein [Hordeum vulgare subsp. vulgare] | AK355186.1 | Hordeum vulgare subsp. vulgare mRNA for predicted protein, complete cds |
| CCATCTGCAGCTGGTCAAGA |
| MDEB027 | CATCGACATCACCTGGGTGT | 227–241 | EMT19452.1 | hypothetical protein F775_30045 [Aegilops tauschii] | AK372267.1 | Hordeum vulgare subsp. vulgare mRNA for predicted protein, complete cds |
| TTCTTGTTCCCCACGGCTTC |
| MDEB046 | TACATCAAAGCGCAGGCAGA | 176–267 | EMS50881.1 | hypothetical protein TRIUR3_00733 [Triticum urartu] | HG670306.1 | Triticum aestivum chromosome 3B, genomic scaffold, cultivar Chinese Spring |
| AAGGAGTTGACATGGCTCGG |
| MDEB050 | CGCCTACACAAGATGGTGGT | 172–257 | EMT04363.1 | Putative disease resistance protein R Aegilops GA1 [tauschii] | EF439840.1 | Triticum aestivum Lr1 disease resistance protein (Lr1) gene, complete cds |
| CACTCTGTCGAAATGCAGCG |
| MDEB051 | GCCTGCTGAAGATGCTCAGA | 148–237 | XP_003570802.2 | ATP-dependent helicase BRM [Brachypodium distachyon] | XM_003570754.2 | Brachypodium distachyon ATP-dependent helicase BRM (LOC100833895), mRNA |
| CCAGCAGTACAACCAGAGCA |
| MDEB054 | ACCGGCATTTCCTACACTGG | 226–235 | EMS59894.1 | hypothetical protein TRIUR3_16939 [Triticum urartu] | -- | -- |
| TCCTCACAGCTCTCACCACA |
| MDEB065 | CAAGAGCGACCTGGTGAAGT | 156–230 | EMS64980.1 | Chromodomain-helicase-DNA-binding protein 4 [Triticum urartu] | XM_010231390.1 | Brachypodium distachyon uncharacterized LOC100835479, mRNA |
| CTCGTTCCCATCATCCGCAA |
| MDEB076 | ATCCACGTTTCCCTCTGCTG | 229–248 | -- | -- | HG670306.1 | Triticum aestivum chromosome 3B, genomic scaffold, cultivar Chinese Spring |
| CCAGTCCCCACTACCAGCTA |
| MDEB083 | TGAGGCTGGGACTGAAGAGT | 191–212 | EMT32999.1 | NAC domain-containing protein 18 [Aegilops tauschii] | FR821751.1 | TPA_exp: Hordeum vulgare subsp. vulgare mRNA for NAC transcription factor (nac041 gene) |
| CTTCTCAGCTGCTGACCTCC |
| MDEB091 | ACCCCCAGCTACTACCATGT | 226–248 | -- | -- | AK366111.1 | Hordeum vulgare subsp. vulgare mRNA for predicted protein, complete cds |
| GAGATGGAGCCTACCGAAGC |
| MDEB094 | CGCCTCTTCCACGTCTTTGA | 138–267 | ADP02196.1 | DUF292 domain-containing protein [Triticum aestivum] | AK370210.1 | Hordeum vulgare subsp. vulgare mRNA for predicted protein, complete cds |
| GATGGTGCTCCTCGAGATCG |
| MDEB095 | CAGCTGTTCTGGAGGGTGAG | 216–280 | EMT08711.1 | hypothetical protein F775_20656 [Aegilops tauschii] | AK251255.1 | Hordeum vulgare subsp. vulgare cDNA clone: FLbaf115d04, mRNA sequence |
| TCAGAAGGTGACGACGCTTC |
| MDEB100 | TGGTCGCGAGATCTTATGGG | 184–193 | -- | -- | HG670306.1 | Triticum aestivum chromosome 3B, genomic scaffold, cultivar Chinese Spring |
| TAAACAACAGCACCTGGCCT |
